# Supplementary material for: Slow Freezing Versus Vitrification of Mouse Ovaries: from Ex Vivo Analyses to Successful Pregnancies after Auto-Transplantation
Source: PubMed Central journal article supplement (PMC6928220; doi:10.1038/s41598-019-56182-8), 2019-12-23

**SLOW FREEZING VERSUS VITRIFICATION OF MOUSE OVARIES: FROM  
EX VIVO ANALYSES TO SUCCESSFUL PREGNANCIES AFTER AUTO-  
TRANSPLANTATION**

Carmen Terren, Maité Fransolet, Marie Ancion, Michelle Nisolle & Carine Munaut

Table S1: Experimental distribution of ex vivo analysed ovaries

| <b>Analysis</b> | <b>CT</b> | <b>CT<br/>cult</b> | <b>SF</b> | <b>SF<br/>cult</b> | <b>VT</b> | <b>VT<br/>cult</b> |
|-----------------|-----------|--------------------|-----------|--------------------|-----------|--------------------|
| <b>IHC</b>      | 16        | 10                 | 5         | 5                  | 4         | 5                  |
| <b>RTqPCR</b>   | 22        | 10                 | 9         | 9                  | 9         | 9                  |
| <b>WB</b>       | 16        | 10                 | 7         | 5                  | 6         | 6                  |
| <b>Total</b>    | 54        | 30                 | 21        | 19                 | 19        | 20                 |

Table S2: p-values associated to individual differences between the experimental groups corrected for multiple testing (Bonferroni's correction)

| <b>Comparisons</b>    | <b>Pregnant mice</b> | <b>Number of pregnancies</b> |
|-----------------------|----------------------|------------------------------|
|                       | p-values             | p-values                     |
| <b>CT versus SF</b>   | ns                   | ns                           |
| <b>vs VTo</b>         | ns                   | 0.4632                       |
| <b>vs VTc</b>         | <b>0.0008 (***)</b>  | <b>0.0044 (*)</b>            |
| <b>SF versus VTo</b>  | ns                   | 0.1472                       |
| <b>vs VTc</b>         | <b>0.0008 (***)</b>  | <b>0.0132 (*)</b>            |
| <b>VTo versus VTc</b> | <b>0.0156 (*)</b>    | NA                           |

NA : not applicable ; ns : non significant

**Figure S1:** Representative western blot for (a) caspase-3, (b) LC3 and (c) BMP15 proteins. CT: control/fresh ovaries; SF: slow frozen/thawed ovaries, VTo: open vitrified/warmed ovaries, cult: *ex vivo* culture during 4 hours.

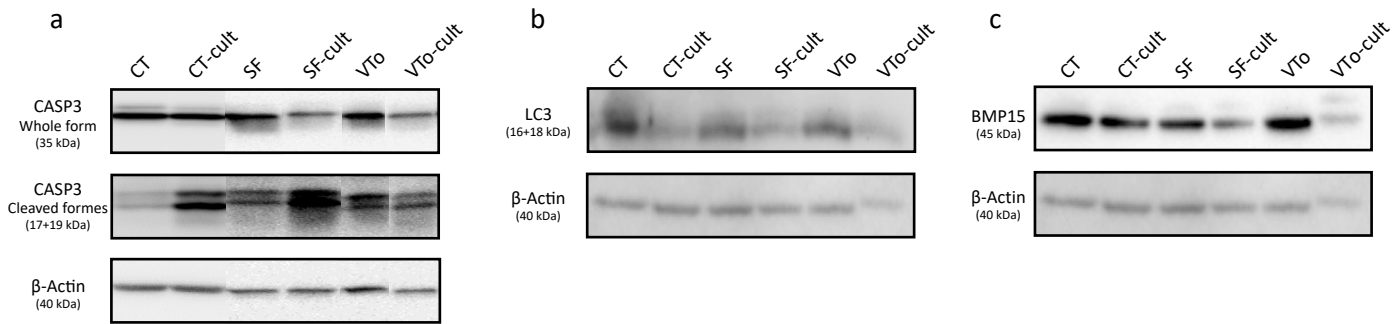

Figure S2: Experimental design and time line for the mice model of induced ovarian failure.

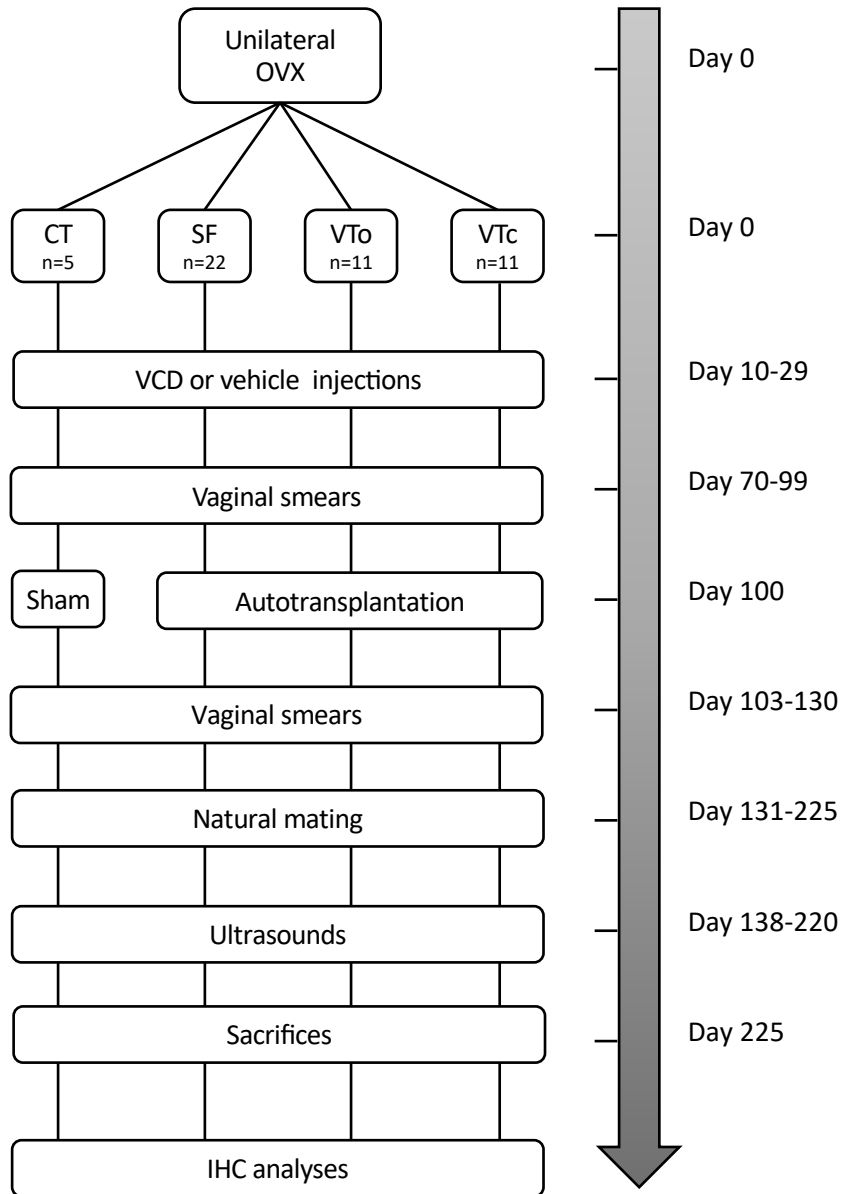

Figure S3: Follow-up of the induction of menopause by daily vaginal smears from 8 to 11 weeks after the first injection of VCD in unilaterally ovariectomized mice. n=44 mice

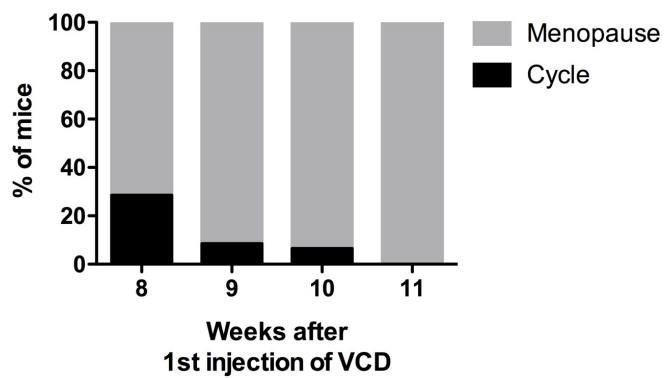

Supplement: 41598_2019_56182_MOESM1_ESM.pdf [file 41598_2019_56182_MOESM1_ESM.pdf]
